# Supplementary material for: Monitoring shear-zone weakening in East Antarctic outlet glaciers through differential InSAR measurements
Source: Copernicus journal article supplement (doi:10.5194/tc-19-4533-2025), 2025-10-14
Supplement: Supplementary file [file tc-19-4533-2025-supplement-title-page.pdf › tc-19-4533-2025-supplement-title-page.pdf]

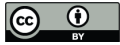

## *Supplement of*

# **Monitoring shear-zone weakening in East Antarctic outlet glaciers through differential InSAR measurements**

**Christian T. Wild et al.**

*Correspondence to:* Christian T. Wild ([christian.wild@uibk.ac.at](mailto:christian.wild@uibk.ac.at))

- [tc-19-4533-2025-supplement-title-page.pdf](#)
- [PriestleyPaper\\_SI\\_v3.1.docx](#)
- [PriestleyPaper\\_SI\\_v3.1.pdf](#)
- [Video S1.gif](#)

The copyright of individual parts of the supplement might differ from the article licence.
